# Supplementary material for: Sphingolipidomic study of davidiin-treated HepG2 human hepatocellular carcinoma cells using UHPLC-MS
Source: Royal Society of Chemistry journal article supplement (doi:10.1039/c7ra11266a), 2017-01-01
Supplement: c7ra11266a1.pdf [file c7ra11266a1.pdf]

*Electronic supplementary information (ESI)*

**Sphingolipidomic study of davidiin-treated HepG2 human  
hepatocellular carcinoma cells using UHPLC-MS**

Li-Min Xie,<sup>a,§</sup> Lee-Fong Yau,<sup>a,§</sup> Zhi-Hong Jiang,<sup>a,d</sup> Li-Yan Zhang,<sup>b</sup> Yun Xia,<sup>\*,c</sup> and  
Jing-Rong Wang<sup>\*,a</sup>

**Contents**

**Table 1** Identification and quantification of SPLs in HepG2 cells by using UHPLC-Q-TOF and UHPLC-QQQ MS

**Table 2** The 80 potential SPL markers identified in davidiin-treated HepG2 cells (VIP > 1).

---

<sup>a</sup> State Key Laboratory of Quality Research in Chinese Medicine, Macau Institute for Applied Research in Medicine and Health, Macau University of Science and Technology, Avenida Wai Long, Taipa, Macau, China. Email: jrwang@must.edu.mo; Fax: +853-28825886; Tel: +853-88972404

<sup>b</sup> College of Pharmacy, Guiyang University of Chinese Medicine, Guiyang 550025, China

<sup>c</sup> Baoshan Hospital of Integrated Chinese and Western Medicine, Shanghai 201999, China. Email: xuzhiyang1998@126.com

<sup>d</sup> International Institute for Translational Chinese Medicine, Guangzhou University of Chinese Medicine, Guangzhou 510006, China

<sup>§</sup> These authors contributed equally to this work and should be considered co-first authors

Table 1 Identification and quantification of SPLs in HepG2 cells by using UHPLC-Q-TOF and UHPLC-QQQ MS

| Class            | Name             | $t_R$ (min)             | [M + H] <sup>+</sup><br>( $m/z$ ) | Molecular<br>Formula                            | Measured<br>Mass                                | Calculated<br>Mass | Error<br>(ppm) | MS/MS Fragments ( $m/z$ )                                  | MRM transitions |
|------------------|------------------|-------------------------|-----------------------------------|-------------------------------------------------|-------------------------------------------------|--------------------|----------------|------------------------------------------------------------|-----------------|
| DHCer            | Cer (m18:0/14:0) | 13.22                   | 496.5082                          | C <sub>32</sub> H <sub>65</sub> NO <sub>2</sub> | 495.5008                                        | 495.5015           | -1.43          | 268.3008, 286.3121, 478.4993                               | 496.5 268.3     |
|                  | Cer (m18:0/16:0) | 14.70                   | 524.5394                          | C <sub>34</sub> H <sub>69</sub> NO <sub>2</sub> | 523.5307                                        | 523.5328           | -3.99          | 268.3001, 286.3087, 506.5271                               | 524.5 268.3     |
|                  | Cer (m18:0/18:0) | 15.89                   | 552.5705                          | C <sub>36</sub> H <sub>73</sub> NO <sub>2</sub> | 551.5641                                        | 551.5641           | -0.07          | 268.3008, 286.3104, 534.5596                               | 552.6 268.3     |
|                  | Cer (m18:0/20:0) | 17.26                   | 580.6025                          | C <sub>38</sub> H <sub>77</sub> NO <sub>2</sub> | 579.5971                                        | 579.5954           | 2.80           | 268.3010, 286.3122, 562.5921                               | 580.6 268.3     |
|                  | Cer (m18:0/22:0) | 18.87                   | 608.6332                          | C <sub>40</sub> H <sub>81</sub> NO <sub>2</sub> | 607.6269                                        | 607.6267           | 0.25           | 268.3004, 286.3111, 590.6233                               | 608.6 268.3     |
|                  | Cer (m18:0/23:0) | 19.87                   | 622.6489                          | C <sub>41</sub> H <sub>83</sub> NO <sub>2</sub> | 621.6413                                        | 621.6424           | -1.77          | 268.3006, 286.3117, 604.6394                               | 622.6 268.3     |
|                  | Cer (m18:0/24:1) | 19.11                   | 634.6494                          | C <sub>42</sub> H <sub>83</sub> NO <sub>2</sub> | 633.6421                                        | 633.6424           | -0.46          | 268.3008, 286.3119, 616.6398                               | 634.6 268.3     |
|                  | Cer (d18:0/14:0) | 12.47                   | 512.5035                          | C <sub>32</sub> H <sub>65</sub> NO <sub>3</sub> | 511.4965                                        | 511.4964           | 0.08           | 266.2862, 302.3050, 494.4930, 476.4841                     | 512.5 266.3     |
|                  | Cer (d18:0/16:0) | 13.52                   | 540.5343                          | C <sub>34</sub> H <sub>69</sub> NO <sub>3</sub> | 539.5270                                        | 539.5278           | -1.33          | 266.2853, 284.2955, 302.3055, 522.5246, 504.5120           | 540.5 266.3     |
|                  | Cer (d18:0/18:0) | 14.83                   | 568.5652                          | C <sub>36</sub> H <sub>73</sub> NO <sub>3</sub> | 567.5577                                        | 567.5591           | -2.33          | 266.2859, 284.2953, 302.3064, 532.5445, 550.5552           | 568.6 266.3     |
|                  | Cer (d18:0/22:0) | 17.81                   | 624.6282                          | C <sub>40</sub> H <sub>81</sub> NO <sub>3</sub> | 623.6213                                        | 623.6217           | -0.63          | 266.2861, 284.2955, 302.3063, 588.6072, 606.6181           | 624.6 266.3     |
|                  | Cer (d18:0/23:0) | 18.62                   | 638.6255                          | C <sub>41</sub> H <sub>83</sub> NO <sub>3</sub> | 637.6362                                        | 637.6373           | -1.80          | 266.2868, 284.2962, 602.6177, 620.6339                     | 638.6 266.3     |
|                  | Cer (d18:0/24:0) | 19.57                   | 652.6586                          | C <sub>42</sub> H <sub>85</sub> NO <sub>3</sub> | 651.6516                                        | 651.6530           | -2.10          | 266.2850, 284.2948, 302.3054, 616.6399, 634.6500           | 652.7 266.3     |
|                  | Cer              | Cer (d18:1/12:0) I.S.-1 | 11.07                             | 482.4565                                        | C <sub>30</sub> H <sub>59</sub> NO <sub>3</sub> | 481.4496           | 481.4495       | 0.29                                                       | 264.2678        |
| Cer (m18:1/16:0) |                  | 13.70                   | 522.5228                          | C <sub>34</sub> H <sub>67</sub> NO <sub>2</sub> | 521.5150                                        | 521.5172           | -4.10          | 266.2857, 284.2943, 504.5196                               | 522.5 266.3     |
| Cer (m18:1/20:0) |                  | 16.28                   | 578.5868                          | C <sub>38</sub> H <sub>75</sub> NO <sub>2</sub> | 577.5795                                        | 577.5798           | -0.54          | 266.2856, 284.2954, 560.5759                               | 578.6 266.3     |
| Cer (m18:1/22:0) |                  | 17.69                   | 606.6177                          | C <sub>40</sub> H <sub>79</sub> NO <sub>2</sub> | 605.6105                                        | 605.6111           | -0.96          | 266.2859, 284.2948, 588.6076                               | 606.6 266.3     |
| Cer (m18:1/22:1) |                  | 16.49                   | 604.6013                          | C <sub>40</sub> H <sub>77</sub> NO <sub>2</sub> | 603.5981                                        | 603.5954           | 4.47           | 266.2862, 284.2944, 586.5921                               | 604.6 266.3     |
| Cer (m18:1/24:0) |                  | 19.44                   | 634.6488                          | C <sub>42</sub> H <sub>83</sub> NO <sub>2</sub> | 633.6415                                        | 633.6424           | -1.40          | 266.2855, 284.2953, 616.6393                               | 634.6 266.3     |
| Cer (m18:1/24:1) |                  | 17.87                   | 632.6318                          | C <sub>42</sub> H <sub>81</sub> NO <sub>2</sub> | 631.6260                                        | 631.6267           | -1.19          | 266.2860, 284.2951, 614.6232                               | 632.6 266.3     |
| Cer (m18:2/14:0) |                  | 12.07                   | 492.4763                          | C <sub>32</sub> H <sub>61</sub> NO <sub>2</sub> | 491.4690                                        | 491.4702           | -2.48          | 252.2690, 264.2702, 282.2812, 474.4638                     | 492.5 264.3     |
| Cer (m18:2/18:1) |                  | 14.53                   | 546.5220                          | C <sub>36</sub> H <sub>67</sub> NO <sub>2</sub> | 545.5145                                        | 545.5172           | -4.88          | 264.2700, 262.2690, 282.2810                               | 546.5 264.3     |
| Cer (m18:2/23:0) |                  | 17.16                   | 618.6169                          | C <sub>41</sub> H <sub>79</sub> NO <sub>2</sub> | 617.6100                                        | 617.6111           | -1.78          | 252.2688, 264.2701, 282.2803                               | 618.6 264.3     |
| Cer (m18:2/25:0) |                  | 18.69                   | 646.6488                          | C <sub>43</sub> H <sub>83</sub> NO <sub>2</sub> | 645.6366                                        | 645.6424           | -4.37          | 252.2692, 264.2700, 282.2808, 628.6434                     | 646.6 264.3     |
| Cer (d16:1/22:0) |                  | 15.91                   | 594.5811                          | C <sub>38</sub> H <sub>75</sub> NO <sub>3</sub> | 593.5736                                        | 593.5747           | -1.79          | 224.2388, 236.2382, 254.2490, 558.5606, 576.5692           | 594.6 236.2     |
| Cer (d18:1/14:0) |                  | 12.07                   | 510.4868                          | C <sub>32</sub> H <sub>63</sub> NO <sub>3</sub> | 509.4800                                        | 509.4808           | -1.63          | 252.2704, 264.2699, 282.2813                               | 510.5 264.3     |
| Cer (d18:1/16:0) |                  | 13.23                   | 538.5012                          | C <sub>34</sub> H <sub>67</sub> NO <sub>3</sub> | 537.5119                                        | 537.5121           | -0.33          | 252.2691, 264.2701, 282.2809, 300.2937, 502.4986, 520.5089 | 538.5 264.3     |
| Cer (d18:1/18:0) |                  | 14.55                   | 566.5505                          | C <sub>36</sub> H <sub>71</sub> NO <sub>3</sub> | 565.5433                                        | 565.5434           | -0.18          | 252.2691, 264.2702, 282.2807, 530.5283, 548.5399           | 566.6 264.3     |

|       |                           |       |          |                                                                 |          |          |       |                                                  |       |       |
|-------|---------------------------|-------|----------|-----------------------------------------------------------------|----------|----------|-------|--------------------------------------------------|-------|-------|
|       | Cer (d18:1/20:3)          | 14.55 | 588.5326 | C <sub>38</sub> H <sub>69</sub> NO <sub>3</sub>                 | 587.5253 | 587.5278 | -4.24 | 264.2708, 570.5238                               | 588.5 | 264.3 |
|       | Cer (d18:1/21:3)          | 15.25 | 602.5475 | C <sub>39</sub> H <sub>71</sub> NO <sub>3</sub>                 | 601.5400 | 601.5434 | -2.41 | 252.2689, 264.2706, 282.2811                     | 602.5 | 264.3 |
|       | Cer (d18:1/22:0)          | 17.27 | 622.6122 | C <sub>40</sub> H <sub>79</sub> NO <sub>3</sub>                 | 621.6054 | 621.6060 | -1.05 | 252.2691, 264.2701, 282.2804, 604.6013           | 622.6 | 264.3 |
|       | Cer (d18:1/22:1)          | 16.34 | 620.5788 | C <sub>40</sub> H <sub>77</sub> NO <sub>3</sub>                 | 619.5893 | 619.5904 | -1.71 | 252.2689, 264.2699, 282.2810, 584.5735, 602.5873 | 620.6 | 264.3 |
|       | Cer (d18:1/22:3)          | 15.91 | 616.5629 | C <sub>40</sub> H <sub>73</sub> NO <sub>3</sub>                 | 615.5556 | 615.5591 | -4.06 | 252.2696, 264.2688, 282.2808                     | 616.6 | 264.3 |
|       | Cer (d18:1/23:0)          | 17.76 | 636.6099 | C <sub>41</sub> H <sub>81</sub> NO <sub>3</sub>                 | 635.6204 | 635.6217 | -1.97 | 264.2711, 282.2811, 600.6069, 618.6192           | 636.6 | 264.3 |
|       | Cer (d18:1/23:1)          | 16.79 | 634.6116 | C <sub>41</sub> H <sub>79</sub> NO <sub>3</sub>                 | 633.6052 | 633.6060 | -1.33 | 264.2702, 282.2809, 598.5910, 616.6025           | 634.6 | 264.3 |
|       | Cer (d18:1/23:3)          | 16.64 | 630.5784 | C <sub>41</sub> H <sub>75</sub> NO <sub>3</sub>                 | 629.5712 | 629.5747 | -3.92 | 264.2708                                         | 630.6 | 264.3 |
|       | Cer (d18:1/23:4)          | 15.48 | 628.5627 | C <sub>41</sub> H <sub>73</sub> NO <sub>3</sub>                 | 627.5554 | 627.5591 | -4.24 | 252.2693, 264.2693, 282.2781                     | 628.6 | 264.3 |
|       | Cer (d18:1/24:0)          | 18.87 | 650.6436 | C <sub>42</sub> H <sub>83</sub> NO <sub>3</sub>                 | 649.6370 | 649.6373 | -0.49 | 252.2691, 264.2700, 282.2808, 614.6235, 632.6341 | 650.6 | 264.3 |
|       | Cer (d18:1/24:1)          | 17.44 | 648.6285 | C <sub>42</sub> H <sub>81</sub> NO <sub>3</sub>                 | 647.6216 | 647.6217 | -0.11 | 252.2694, 264.2703, 282.2810, 612.6078, 630.6177 | 648.6 | 264.3 |
|       | Cer (d18:1/25:1)          | 17.91 | 662.6425 | C <sub>43</sub> H <sub>83</sub> NO <sub>3</sub>                 | 661.6358 | 661.6373 | -2.27 | 264.2704, 282.2812, 626.6224, 644.6371           | 662.6 | 264.3 |
|       | Cer (d18:2/16:1)          | 12.48 | 534.4851 | C <sub>34</sub> H <sub>63</sub> NO <sub>3</sub>                 | 533.4779 | 533.4808 | -3.56 | 250.2531, 262.2535, 280.2649                     | 534.5 | 262.3 |
|       | Cer (d18:2/18:1)          | 13.61 | 562.5169 | C <sub>36</sub> H <sub>67</sub> NO <sub>3</sub>                 | 561.5096 | 561.5121 | -4.45 | 262.2543, 280.2646                               | 562.5 | 262.3 |
|       | Cer (d18:2/22:0)          | 16.18 | 620.5966 | C <sub>40</sub> H <sub>77</sub> NO <sub>3</sub>                 | 619.5893 | 619.5904 | -1.78 | 250.2525, 262.2534, 280.2644, 584.5732, 602.5858 | 620.6 | 262.3 |
|       | Cer (d18:2/22:2)          | 15.54 | 616.5624 | C <sub>40</sub> H <sub>73</sub> NO <sub>3</sub>                 | 615.5553 | 615.5591 | -4.48 | 250.2534, 262.2531                               | 616.6 | 262.3 |
|       | Cer (d18:2/24:1)          | 16.49 | 646.6100 | C <sub>42</sub> H <sub>79</sub> NO <sub>3</sub>                 | 645.6052 | 645.6060 | -1.18 | 262.2534, 280.2646, 298.2747, 610.5888, 628.6024 | 646.6 | 262.3 |
|       | Cer (d18:2/24:2)          | 17.27 | 644.5946 | C <sub>42</sub> H <sub>77</sub> NO <sub>3</sub>                 | 643.5874 | 643.5904 | -4.65 | 262.2541                                         | 644.6 | 262.3 |
|       | Cer (d19:1/24:0)          | 19.85 | 664.6595 | C <sub>43</sub> H <sub>85</sub> NO <sub>3</sub>                 | 663.6507 | 663.6530 | -3.36 | 278.2843, 296.2966, 646.6512                     | 664.7 | 278.3 |
|       | Cer (d19:1/24:1)          | 17.70 | 662.6425 | C <sub>43</sub> H <sub>81</sub> NO <sub>3</sub>                 | 661.6358 | 661.6373 | -2.27 | 278.2845, 296.2955, 626.6240, 644.6370           | 662.6 | 278.3 |
| Cer1P | Cer1P (d18:1/12:0) I.S.-2 | 10.01 | 562.4233 | C <sub>30</sub> H <sub>60</sub> NO <sub>6</sub> P               | 561.4149 | 561.4158 | -1.60 | 264.2688                                         | 562.5 | 264.3 |
|       | Cer1P (d18:0/3:0)         | 8.29  | 438.2976 | C <sub>21</sub> H <sub>44</sub> NO <sub>6</sub> P               | 437.2902 | 437.2906 | -1.03 | 266.2862, 284.2950                               | 438.3 | 266.3 |
|       | Cer1P (d18:1/24:4)        | 12.18 | 722.5507 | C <sub>42</sub> H <sub>76</sub> NO <sub>6</sub> P               | 721.5416 | 721.5410 | 0.73  | 264.2700                                         | 722.6 | 264.3 |
|       | Cer1P (d18:1/26:4)        | 13.35 | 750.5837 | C <sub>44</sub> H <sub>80</sub> NO <sub>6</sub> P               | 749.5756 | 749.5723 | 4.40  | 264.2692                                         | 750.6 | 264.3 |
|       | Cer1P (d18:1/28:4)        | 14.61 | 778.6152 | C <sub>46</sub> H <sub>84</sub> NO <sub>6</sub> P               | 777.6078 | 777.6036 | 2.74  | 264.2709                                         | 778.6 | 264.3 |
|       | Cer1P (d18:1/29:4)        | 15.31 | 792.6305 | C <sub>47</sub> H <sub>86</sub> NO <sub>6</sub> P               | 791.6229 | 791.6193 | 4.62  | 264.2716, 774.6224                               | 792.6 | 264.3 |
| DHSM  | SM (d18:0/18:0)           | 13.21 | 733.6216 | C <sub>41</sub> H <sub>85</sub> N <sub>2</sub> O <sub>6</sub> P | 732.6146 | 732.6145 | 0.11  | 184.0146, 266.2769                               | 733.6 | 184.1 |
|       | SM (d19:0/17:0)           | 13.90 | 733.6216 | C <sub>41</sub> H <sub>85</sub> N <sub>2</sub> O <sub>6</sub> P | 732.6146 | 732.6145 | 0.11  | 184.0748, 280.2996                               | 733.6 | 184.1 |
|       | SM (d31:0)                | 9.98  | 661.5268 | C <sub>36</sub> H <sub>73</sub> N <sub>2</sub> O <sub>6</sub> P | 660.5195 | 660.5206 | -1.71 | 184.0742                                         | 661.5 | 184.1 |
|       | SM (d33:0)                | 12.10 | 691.5734 | C <sub>38</sub> H <sub>79</sub> N <sub>2</sub> O <sub>6</sub> P | 690.5675 | 690.5676 | -0.12 | 184.0745                                         | 691.6 | 184.1 |
|       | SM (d35:0)                | 12.60 | 719.6084 | C <sub>40</sub> H <sub>83</sub> N <sub>2</sub> O <sub>6</sub> P | 718.6015 | 718.5989 | 3.72  | 184.0747                                         | 719.6 | 184.1 |

|    |                        |       |          |                                                                 |          |          |       |                                        |  |       |       |
|----|------------------------|-------|----------|-----------------------------------------------------------------|----------|----------|-------|----------------------------------------|--|-------|-------|
|    | SM (d37:0)             | 14.55 | 747.6362 | C <sub>42</sub> H <sub>87</sub> N <sub>2</sub> O <sub>6</sub> P | 746.6289 | 746.6302 | -1.75 | 184.0743                               |  | 747.6 | 184.1 |
|    | SM (d38:0)             | 15.20 | 761.6517 | C <sub>43</sub> H <sub>89</sub> N <sub>2</sub> O <sub>6</sub> P | 760.6444 | 760.6458 | -1.84 | 184.0745                               |  | 761.7 | 184.1 |
|    | SM (d41:0)             | 17.19 | 803.6982 | C <sub>46</sub> H <sub>95</sub> N <sub>2</sub> O <sub>6</sub> P | 802.6930 | 802.6928 | 0.24  | 184.0745                               |  | 803.7 | 184.1 |
|    | SM (t18:0/16:0)        | 12.12 | 721.5827 | C <sub>39</sub> H <sub>81</sub> N <sub>2</sub> O <sub>7</sub> P | 720.5752 | 720.5781 | -4.11 | 184.0747, 264.2705                     |  | 721.6 | 184.1 |
| SM | SM (d18:1/12:0) I.S.-3 | 10.44 | 647.5119 | C <sub>35</sub> H <sub>71</sub> N <sub>2</sub> O <sub>6</sub> P | 646.5046 | 646.5050 | -0.59 | 184.0736, 264.2698                     |  | 647.5 | 184.1 |
|    | SM (d17:1/16:0)        | 11.68 | 689.5593 | C <sub>38</sub> H <sub>77</sub> N <sub>2</sub> O <sub>6</sub> P | 688.5519 | 688.5519 | -0.10 | 184.0748, 250.2533                     |  | 689.6 | 184.1 |
|    | SM (d17:1/22:0)        | 15.34 | 773.6614 | C <sub>44</sub> H <sub>89</sub> N <sub>2</sub> O <sub>6</sub> P | 772.6450 | 772.6458 | -1.13 | 184.0746, 250.2535                     |  | 773.7 | 184.1 |
|    | SM (d18:1/14:0)        | 11.19 | 675.5434 | C <sub>37</sub> H <sub>75</sub> N <sub>2</sub> O <sub>6</sub> P | 674.5361 | 674.5363 | -0.31 | 184.0749, 236.2396, 264.2698           |  | 675.5 | 184.1 |
|    | SM (d18:1/16:0 (OH))   | 11.72 | 719.5729 | C <sub>39</sub> H <sub>79</sub> N <sub>2</sub> O <sub>7</sub> P | 718.5615 | 718.5625 | -1.36 | 184.0744, 264.2697                     |  | 719.6 | 184.1 |
|    | SM (d18:1/16:0)        | 12.02 | 703.5754 | C <sub>39</sub> H <sub>79</sub> N <sub>2</sub> O <sub>6</sub> P | 702.5684 | 702.5676 | 1.18  | 184.0762, 264.2700                     |  | 703.6 | 184.1 |
|    | SM (d18:1/17:1)        | 11.95 | 715.5733 | C <sub>40</sub> H <sub>81</sub> N <sub>2</sub> O <sub>6</sub> P | 714.5652 | 714.5676 | -3.32 | 184.0743, 264.2697                     |  | 715.6 | 184.1 |
|    | SM (d18:1/18:0)        | 13.36 | 731.6062 | C <sub>41</sub> H <sub>83</sub> N <sub>2</sub> O <sub>6</sub> P | 730.5988 | 730.5989 | -0.05 | 184.0749, 264.2699                     |  | 731.6 | 184.1 |
|    | SM (d18:1/20:0)        | 14.65 | 759.6374 | C <sub>43</sub> H <sub>87</sub> N <sub>2</sub> O <sub>6</sub> P | 758.6301 | 758.6302 | -0.12 | 184.0749, 264.2690                     |  | 759.6 | 184.1 |
|    | SM (d18:1/22:0)        | 15.98 | 787.6690 | C <sub>45</sub> H <sub>91</sub> N <sub>2</sub> O <sub>6</sub> P | 786.6617 | 786.6615 | 0.33  | 184.0750, 264.2705                     |  | 787.7 | 184.1 |
|    | SM (d18:1/22:1)        | 15.06 | 785.6530 | C <sub>45</sub> H <sub>89</sub> N <sub>2</sub> O <sub>6</sub> P | 784.6454 | 784.6458 | -0.50 | 184.0749, 264.2703                     |  | 785.7 | 184.1 |
|    | SM (d18:1/23:0)        | 16.64 | 801.6843 | C <sub>46</sub> H <sub>93</sub> N <sub>2</sub> O <sub>6</sub> P | 800.6769 | 800.6771 | -0.31 | 184.0747, 264.2709                     |  | 801.7 | 184.1 |
|    | SM (d18:1/23:1)        | 15.48 | 799.6686 | C <sub>46</sub> H <sub>91</sub> N <sub>2</sub> O <sub>6</sub> P | 798.6610 | 798.6615 | -0.56 | 184.0749, 264.2700                     |  | 799.7 | 184.1 |
|    | SM (d18:1/23:3)        | 15.06 | 795.6328 | C <sub>46</sub> H <sub>87</sub> N <sub>2</sub> O <sub>6</sub> P | 794.6267 | 794.6302 | -4.38 | 184.0745, 264.2715                     |  | 795.6 | 184.1 |
|    | SM (d18:1/24:0)        | 17.31 | 815.7001 | C <sub>47</sub> H <sub>95</sub> N <sub>2</sub> O <sub>6</sub> P | 814.6927 | 814.6928 | -0.07 | 184.0749, 264.2693, 797.6891           |  | 815.7 | 184.1 |
|    | SM (d18:1/24:1)        | 16.39 | 813.6843 | C <sub>47</sub> H <sub>93</sub> N <sub>2</sub> O <sub>6</sub> P | 812.6765 | 812.6771 | -0.82 | 184.0758, 264.2705                     |  | 813.7 | 184.1 |
|    | SM (d18:1/26:1)        | 17.04 | 841.7142 | C <sub>49</sub> H <sub>97</sub> N <sub>2</sub> O <sub>6</sub> P | 840.7066 | 840.7084 | -2.16 | 184.0744, 264.2688                     |  | 841.7 | 184.1 |
|    | SM (d18:2/16:0)        | 11.43 | 701.5593 | C <sub>39</sub> H <sub>77</sub> N <sub>2</sub> O <sub>6</sub> P | 700.5519 | 700.5519 | 0.03  | 184.0749, 262.2533, 280.2643           |  | 701.6 | 184.1 |
|    | SM (d18:2/18:0)        | 12.52 | 729.5906 | C <sub>41</sub> H <sub>81</sub> N <sub>2</sub> O <sub>6</sub> P | 728.5832 | 728.5832 | 0.03  | 184.0750, 262.2535                     |  | 729.6 | 184.1 |
|    | SM (d18:2/18:1)        | 12.67 | 727.5726 | C <sub>41</sub> H <sub>79</sub> N <sub>2</sub> O <sub>6</sub> P | 726.5666 | 726.5676 | -1.40 | 184.0746, 262.2530, 280.2646           |  | 727.6 | 184.1 |
|    | SM (d18:2/20:0)        | 13.73 | 757.6215 | C <sub>43</sub> H <sub>85</sub> N <sub>2</sub> O <sub>6</sub> P | 756.6138 | 756.6145 | -0.93 | 184.0749, 262.2538                     |  | 757.6 | 184.1 |
|    | SM (d18:2/22:0)        | 14.85 | 785.6531 | C <sub>45</sub> H <sub>89</sub> N <sub>2</sub> O <sub>6</sub> P | 784.6457 | 784.6458 | -0.14 | 184.0748, 262.2535                     |  | 785.7 | 184.1 |
|    | SM (d18:2/22:1)        | 13.91 | 783.6359 | C <sub>45</sub> H <sub>87</sub> N <sub>2</sub> O <sub>6</sub> P | 782.6286 | 782.6302 | -1.98 | 184.0743, 262.2527                     |  | 783.6 | 184.1 |
|    | SM (d18:2/23:0)        | 15.73 | 799.6676 | C <sub>46</sub> H <sub>91</sub> N <sub>2</sub> O <sub>6</sub> P | 798.6600 | 798.6615 | -1.89 | 184.0746, 262.2526                     |  | 799.7 | 184.1 |
|    | SM (d18:2/24:1)        | 15.20 | 811.6687 | C <sub>47</sub> H <sub>91</sub> N <sub>2</sub> O <sub>6</sub> P | 810.6612 | 810.6615 | -0.38 | 184.0747, 262.2534                     |  | 811.7 | 184.1 |
|    | SM (d18:2/24:3)        | 14.85 | 807.6349 | C <sub>47</sub> H <sub>87</sub> N <sub>2</sub> O <sub>6</sub> P | 806.6274 | 806.6302 | -3.47 | 184.0746, 250.2524, 262.2533, 280.2646 |  | 807.6 | 184.1 |
|    | SM (d19:1/16:0)        | 12.57 | 717.5900 | C <sub>40</sub> H <sub>81</sub> N <sub>2</sub> O <sub>6</sub> P | 716.5825 | 716.5832 | -1.05 | 184.0748, 278.2849                     |  | 717.6 | 184.1 |

|        |                            |       |          |                                                                 |          |          |       |                                                                      |  |       |       |
|--------|----------------------------|-------|----------|-----------------------------------------------------------------|----------|----------|-------|----------------------------------------------------------------------|--|-------|-------|
|        | SM (d37:1)                 | 14.03 | 745.6208 | C <sub>42</sub> H <sub>85</sub> N <sub>2</sub> O <sub>6</sub> P | 744.6134 | 744.6145 | -1.45 | 184.0747                                                             |  | 745.6 | 184.1 |
|        | SM (d38:3)                 | 13.88 | 755.6026 | C <sub>43</sub> H <sub>83</sub> N <sub>2</sub> O <sub>6</sub> P | 754.5982 | 754.5989 | -0.95 | 184.0745                                                             |  | 755.6 | 184.1 |
|        | SM (d39:4)                 | 14.01 | 767.6026 | C <sub>44</sub> H <sub>83</sub> N <sub>2</sub> O <sub>6</sub> P | 766.5953 | 766.5989 | -4.71 | 184.0745                                                             |  | 767.6 | 184.1 |
|        | SM (d41:3)                 | 14.55 | 797.6517 | C <sub>46</sub> H <sub>89</sub> N <sub>2</sub> O <sub>6</sub> P | 796.6432 | 796.6458 | -3.26 | 184.0743                                                             |  | 797.7 | 184.1 |
|        | SM (d43:3)                 | 15.84 | 825.6813 | C <sub>48</sub> H <sub>93</sub> N <sub>2</sub> O <sub>6</sub> P | 824.6740 | 824.6771 | -3.81 | 184.0748                                                             |  | 825.7 | 184.1 |
|        | SM (t18:1/24:0)            | 15.31 | 831.6935 | C <sub>47</sub> H <sub>95</sub> N <sub>2</sub> O <sub>7</sub> P | 830.6855 | 830.6877 | -2.65 | 184.0742, 262.2530                                                   |  | 831.7 | 184.1 |
|        | SM (t34:2)                 | 11.04 | 717.5527 | C <sub>39</sub> H <sub>77</sub> N <sub>2</sub> O <sub>7</sub> P | 716.5458 | 716.5468 | -1.48 | 184.0745                                                             |  | 717.6 | 184.1 |
|        | SM (t42:2)                 | 14.08 | 829.6777 | C <sub>47</sub> H <sub>93</sub> N <sub>2</sub> O <sub>7</sub> P | 828.6705 | 828.6720 | -1.91 | 184.0744                                                             |  | 829.7 | 184.1 |
| HexCer | GalCer (d18:1/12:0) I.S.-4 | 10.45 | 644.5081 | C <sub>36</sub> H <sub>69</sub> NO <sub>8</sub>                 | 643.5018 | 643.5023 | -0.75 | 264.2684                                                             |  | 644.5 | 264.3 |
|        | HexCer (d18:1/20:3)        | 13.35 | 750.5837 | C <sub>44</sub> H <sub>79</sub> NO <sub>8</sub>                 | 749.5756 | 749.5806 | -2.57 | 264.2702, 570.5226                                                   |  | 750.6 | 264.3 |
|        | HexCer (d18:1/26:3)        | 17.23 | 834.6784 | C <sub>50</sub> H <sub>91</sub> NO <sub>8</sub>                 | 833.6709 | 833.6745 | -4.29 | 264.2674, 654.6158                                                   |  | 834.7 | 264.3 |
|        | HexCer (d18:1/26:4)        | 15.84 | 832.6627 | C <sub>50</sub> H <sub>89</sub> NO <sub>8</sub>                 | 831.6550 | 831.6588 | -4.56 | 264.2705, 652.6006, 670.6062                                         |  | 832.7 | 264.3 |
| LacCer | LacCer (d18:1/12:0) I.S.-5 | 10.22 | 806.5606 | C <sub>42</sub> H <sub>79</sub> NO <sub>13</sub>                | 805.5535 | 805.5551 | -2.07 | 264.2683                                                             |  | 806.6 | 264.3 |
|        | LacCer (d17:1/22:0)        | 14.70 | 932.7009 | C <sub>51</sub> H <sub>97</sub> NO <sub>13</sub>                | 931.6935 | 931.6960 | -2.66 | 250.2537, 268.2641, 590.5877, 598.5540                               |  | 932.7 | 250.3 |
|        | LacCer (d18:1/16:0 (OH))   | 11.45 | 878.6184 | C <sub>46</sub> H <sub>87</sub> NO <sub>14</sub>                | 877.6114 | 877.6127 | -1.39 | 252.2693, 264.2697, 518.4934, 536.5043                               |  | 878.6 | 264.3 |
|        | LacCer (d18:1/16:0)        | 11.73 | 862.6236 | C <sub>46</sub> H <sub>87</sub> NO <sub>13</sub>                | 861.6169 | 861.6177 | -0.93 | 264.2702, 282.2808, 502.5082, 520.5082, 844.6123                     |  | 862.6 | 264.3 |
|        | LacCer (d18:1/18:0 (OH))   | 12.48 | 906.6495 | C <sub>48</sub> H <sub>91</sub> NO <sub>14</sub>                | 905.6423 | 905.6440 | -1.87 | 252.2691, 264.2695, 282.2804, 300.2885, 546.5241, 534.5245, 564.5365 |  | 906.6 | 264.3 |
|        | LacCer (d18:1/18:0)        | 12.83 | 890.6541 | C <sub>48</sub> H <sub>91</sub> NO <sub>13</sub>                | 889.6472 | 889.6490 | -2.02 | 264.2694, 282.2814, 530.5303, 548.5386                               |  | 890.7 | 264.3 |
|        | LacCer (d18:1/20:0 (OH))   | 13.66 | 934.6807 | C <sub>50</sub> H <sub>95</sub> NO <sub>14</sub>                | 933.6728 | 933.6753 | -2.60 | 252.2689, 264.2704, 282.2813, 574.5567, 592.5660                     |  | 934.7 | 264.3 |
|        | LacCer (d18:1/22:0)        | 15.31 | 946.7172 | C <sub>52</sub> H <sub>99</sub> NO <sub>13</sub>                | 945.7103 | 945.7116 | -1.42 | 252.2693, 264.2700, 282.2803, 574.5915, 586.5920, 604.6022           |  | 946.7 | 264.3 |
|        | LacCer (d18:1/22:1)        | 14.41 | 944.7002 | C <sub>52</sub> H <sub>97</sub> NO <sub>13</sub>                | 943.6939 | 943.6960 | -2.24 | 252.2690, 264.2700, 282.2811, 584.5738, 602.5867                     |  | 944.7 | 264.3 |
|        | LacCer (d18:1/23:0)        | 15.94 | 960.7323 | C <sub>53</sub> H <sub>101</sub> NO <sub>13</sub>               | 959.7249 | 959.7273 | -2.45 | 252.2695, 264.2684, 282.2813, 600.6054, 618.6188                     |  | 960.7 | 264.3 |
|        | LacCer (d18:1/24:0 (OH))   | 14.93 | 984.6936 | C <sub>54</sub> H <sub>97</sub> NO <sub>14</sub>                | 983.6864 | 983.6909 | -4.61 | 264.2695, 282.2815                                                   |  | 984.7 | 264.3 |
|        | LacCer (d18:1/24:0)        | 16.58 | 974.7484 | C <sub>54</sub> H <sub>103</sub> NO <sub>13</sub>               | 973.7415 | 973.7429 | -1.44 | 252.2689, 264.2707, 282.2816, 614.6213, 632.6337                     |  | 974.7 | 264.3 |
|        | LacCer (d18:1/24:1)        | 15.44 | 972.7253 | C <sub>54</sub> H <sub>101</sub> NO <sub>13</sub>               | 971.7262 | 971.7273 | -1.17 | 252.2693, 264.2700, 282.2805, 612.6076, 630.6180                     |  | 972.7 | 264.3 |
|        | LacCer (t18:0/24:2)        | 15.05 | 988.7274 | C <sub>54</sub> H <sub>101</sub> NO <sub>14</sub>               | 987.7208 | 987.7222 | -1.44 | 252.2690, 264.2702, 282.2806, 616.6029, 628.6029                     |  | 988.7 | 264.3 |
| So     | So (d17:1) I.S.-6          | 6.29  | 286.2563 | C <sub>17</sub> H <sub>35</sub> NO <sub>2</sub>                 | 285.2671 | 285.2668 | 1.02  | 268.2645                                                             |  | 286.3 | 268.3 |
|        | So (m17:2)                 | 6.39  | 268.2633 | C <sub>17</sub> H <sub>33</sub> NO                              | 267.2561 | 267.2562 | -0.60 | 250.2535                                                             |  | 268.3 | 250.3 |
|        | So (m18:1)                 | 9.57  | 284.2954 | C <sub>18</sub> H <sub>37</sub> NO                              | 283.2881 | 283.2875 | 2.12  | 266.2861                                                             |  | 284.3 | 266.3 |
|        | So (m18:2)                 | 8.79  | 282.2794 | C <sub>18</sub> H <sub>35</sub> NO                              | 281.2722 | 281.2719 | 1.21  | 264.2700                                                             |  | 282.3 | 264.3 |
|        | So (m20:2)                 | 9.70  | 310.3109 | C <sub>20</sub> H <sub>39</sub> NO                              | 309.3035 | 309.3032 | 1.03  | 292.2991                                                             |  | 310.3 | 292.3 |

|      |                     |       |          |                                                   |          |          |       |          |  |       |       |
|------|---------------------|-------|----------|---------------------------------------------------|----------|----------|-------|----------|--|-------|-------|
|      | So (m22:2)          | 10.39 | 338.3419 | C <sub>22</sub> H <sub>43</sub> NO                | 337.3347 | 337.3345 | 0.53  | 320.3317 |  | 338.3 | 320.3 |
|      | So (m24:2)          | 11.27 | 366.3731 | C <sub>24</sub> H <sub>47</sub> NO                | 365.3657 | 365.3658 | -0.11 | 348.3636 |  | 366.4 | 348.4 |
|      | So (d15:2)          | 5.01  | 256.2277 | C <sub>15</sub> H <sub>29</sub> NO <sub>2</sub>   | 255.2199 | 255.2198 | 0.27  | 238.2167 |  | 256.2 | 238.2 |
|      | So (d18:1)          | 6.73  | 300.2899 | C <sub>18</sub> H <sub>37</sub> NO <sub>2</sub>   | 299.2829 | 299.2824 | 1.54  | 282.2797 |  | 300.3 | 282.3 |
|      | So (t20:1)          | 8.01  | 344.3150 | C <sub>20</sub> H <sub>41</sub> NO <sub>3</sub>   | 343.3084 | 343.3086 | -0.84 | 326.3067 |  | 344.3 | 326.3 |
| Sa   | Sa (d17:0) I.S.-7   | 6.49  | 288.2915 | C <sub>17</sub> H <sub>37</sub> NO <sub>2</sub>   | 287.2824 | 287.2824 | -0.21 | 270.2805 |  | 288.3 | 270.2 |
|      | Sa (m14:0)          | 5.03  | 230.2480 | C <sub>14</sub> H <sub>31</sub> NO                | 229.2408 | 229.2406 | 0.92  | 212.2386 |  | 230.2 | 212.2 |
|      | Sa (m18:0)          | 7.21  | 286.3106 | C <sub>18</sub> H <sub>39</sub> NO                | 285.3033 | 285.3032 | 0.35  | 268.3006 |  | 286.3 | 268.3 |
|      | Sa (m20:0)          | 7.91  | 314.3416 | C <sub>20</sub> H <sub>43</sub> NO                | 313.3334 | 313.3345 | -3.54 | 296.3327 |  | 314.3 | 296.3 |
|      | Sa (d16:0)          | 4.78  | 274.2742 | C <sub>16</sub> H <sub>35</sub> NO <sub>2</sub>   | 273.2670 | 273.2668 | 0.70  | 256.2649 |  | 274.3 | 256.3 |
|      | Sa (d18:0)          | 6.14  | 302.3060 | C <sub>18</sub> H <sub>39</sub> NO <sub>2</sub>   | 301.2987 | 301.2981 | 1.96  | 284.2950 |  | 302.3 | 284.3 |
|      | Sa (d20:0)          | 6.83  | 330.3367 | C <sub>20</sub> H <sub>43</sub> NO <sub>2</sub>   | 329.3294 | 329.3294 | 0.06  | 312.3268 |  | 330.3 | 312.3 |
|      | Sa (d21:0)          | 7.23  | 344.3518 | C <sub>21</sub> H <sub>45</sub> NO <sub>2</sub>   | 343.3445 | 343.3450 | -1.43 | 326.3434 |  | 344.4 | 326.3 |
|      | Sa (d22:0)          | 7.71  | 358.3680 | C <sub>22</sub> H <sub>47</sub> NO <sub>2</sub>   | 357.3607 | 357.3607 | 0.11  | 340.3587 |  | 358.4 | 340.4 |
|      | Sa (d23:0)          | 9.50  | 372.3828 | C <sub>23</sub> H <sub>49</sub> NO <sub>2</sub>   | 371.3691 | 371.3723 | -8.72 | 354.3720 |  | 372.4 | 354.4 |
|      | Sa (t16:0)          | 5.15  | 290.2693 | C <sub>16</sub> H <sub>35</sub> NO <sub>3</sub>   | 289.2620 | 289.2617 | 1.04  | 272.2582 |  | 290.3 | 272.3 |
|      | Sa (t18:0)          | 6.33  | 318.2996 | C <sub>18</sub> H <sub>39</sub> NO <sub>3</sub>   | 317.2924 | 317.2930 | -1.86 | 300.2888 |  | 318.3 | 300.3 |
|      | Sa (t20:0)          | 7.04  | 346.3311 | C <sub>20</sub> H <sub>43</sub> NO <sub>3</sub>   | 345.3242 | 345.3243 | -0.35 | 328.3196 |  | 346.3 | 328.3 |
|      | Sa (t22:0)          | 8.07  | 374.3629 | C <sub>22</sub> H <sub>47</sub> NO <sub>3</sub>   | 373.3556 | 373.3556 | 0.13  | 356.3522 |  | 374.4 | 356.4 |
| S1P  | S1P (d17:1) I.S.-8  | 6.56  | 366.2406 | C <sub>17</sub> H <sub>36</sub> NO <sub>5</sub> P | 365.2331 | 365.2331 | 0.00  | 250.2508 |  | 366.3 | 250.3 |
| Sa1P | Sa1P (d17:0) I.S.-9 | 6.77  | 368.2574 | C <sub>17</sub> H <sub>38</sub> NO <sub>5</sub> P | 367.2504 | 367.2488 | 4.36  | 270.2788 |  | 368.4 | 270.3 |

DHCer, dihydroceramide; Cer, ceramide; Cer1P, ceramide-1-phosphate; DHSM, dihydrosphingomyelin; SM, sphingomyelin; HexCer, hexosylceramide; LacCer, lactosylceramide; So, sphingosine; Sa, sphinganine; S1P, sphingosine-1-phosphate; Sa1P, sphinganine-1-phosphate. I.S. 1-9 represent the 9 internal standards added for MS analysis

Table 2 The 80 potential SPL markers identified in davidiin-treated HepG2 cells (VIP &gt; 1).

| Class            | Marker           | Content (pmol mg <sup>-1</sup> protein) |                  | Change        | P value      | VIP     |      |
|------------------|------------------|-----------------------------------------|------------------|---------------|--------------|---------|------|
|                  |                  | Control                                 | Davidiin-treated |               |              |         |      |
| DHCer            | Cer (m18:0/14:0) | 3.82 ± 0.43                             | 6.22 ± 0.82      | ↑ (1.6-fold)  | < 0.001      | 1.13    |      |
|                  | Cer (m18:0/16:0) | 16.23 ± 1.66                            | 27.38 ± 1.56     | ↑ (1.7-fold)  | < 0.001      | 1.23    |      |
|                  | Cer (m18:0/18:0) | 9.09 ± 0.72                             | 20.41 ± 2.80     | ↑ (2.2-fold)  | < 0.001      | 1.20    |      |
|                  | Cer (m18:0/20:0) | 20.82 ± 1.62                            | 41.88 ± 4.97     | ↑ (2.0-fold)  | < 0.001      | 1.20    |      |
|                  | Cer (m18:0/22:0) | 30.84 ± 2.33                            | 44.52 ± 4.68     | ↑ (1.4-fold)  | < 0.001      | 1.12    |      |
|                  | Cer (m18:0/24:1) | 29.90 ± 2.08                            | 50.86 ± 3.04     | ↑ (1.7-fold)  | < 0.001      | 1.24    |      |
|                  | Cer (d18:0/14:0) | 0.53 ± 0.17                             | 5.41 ± 0.63      | ↑ (10.2-fold) | < 0.001      | 1.25    |      |
|                  | Cer (d18:0/16:0) | 3.77 ± 0.41                             | 17.41 ± 1.66     | ↑ (4.6-fold)  | < 0.001      | 1.25    |      |
|                  | Cer (d18:0/18:0) | 0.33 ± 0.12                             | 1.75 ± 0.50      | ↑ (5.3-fold)  | < 0.001      | 1.13    |      |
|                  | Cer (d18:0/22:0) | 0.46 ± 0.14                             | 4.47 ± 1.22      | ↑ (9.7-fold)  | < 0.001      | 1.17    |      |
|                  | Cer (d18:0/23:0) | 0.09 ± 0.03                             | 0.64 ± 0.20      | ↑ (7.1-fold)  | < 0.001      | 1.13    |      |
|                  | Cer (d18:0/24:0) | 0.49 ± 0.11                             | 5.67 ± 1.12      | ↑ (11.6-fold) | < 0.001      | 1.21    |      |
|                  | Cer              | Cer (m18:1/16:0)                        | 3.86 ± 0.65      | 2.54 ± 0.31   | ↓ (1.5-fold) | < 0.001 | 1.02 |
|                  |                  | Cer (m18:1/24:0)                        | 17.86 ± 1.19     | 13.62 ± 0.96  | ↓ (1.3-fold) | < 0.001 | 1.14 |
| Cer (m18:2/14:0) |                  | 21.25 ± 2.26                            | 14.37 ± 2.44     | ↓ (1.5-fold)  | < 0.001      | 1.06    |      |
| Cer (m18:2/18:1) |                  | 2.30 ± 0.45                             | 0.77 ± 0.22      | ↓ (3.0-fold)  | < 0.001      | 1.16    |      |
| Cer (m18:2/23:0) |                  | 53.85 ± 6.77                            | 20.99 ± 1.36     | ↓ (2.6-fold)  | < 0.001      | 1.22    |      |
| Cer (m18:2/25:0) |                  | 1.68 ± 0.27                             | 0.59 ± 0.11      | ↓ (2.8-fold)  | < 0.001      | 1.20    |      |
| Cer (d16:1/22:0) |                  | 11.34 ± 1.31                            | 6.79 ± 1.40      | ↓ (1.7-fold)  | < 0.001      | 1.10    |      |
| Cer (d18:1/14:0) |                  | 12.35 ± 1.30                            | 8.52 ± 1.71      | ↓ (1.4-fold)  | < 0.001      | 1.01    |      |
| Cer (d18:1/18:0) |                  | 29.40 ± 1.95                            | 20.55 ± 2.21     | ↓ (1.4-fold)  | < 0.001      | 1.15    |      |
| Cer (d18:1/22:0) |                  | 96.41 ± 11.88                           | 42.90 ± 3.99     | ↓ (2.2-fold)  | < 0.001      | 1.21    |      |
| Cer (d18:1/22:1) |                  | 11.10 ± 0.98                            | 7.95 ± 1.42      | ↓ (1.4-fold)  | < 0.001      | 1.02    |      |
| Cer (d18:1/22:3) |                  | 13.60 ± 1.34                            | 8.08 ± 1.11      | ↓ (1.7-fold)  | < 0.001      | 1.17    |      |
| Cer (d18:1/23:0) |                  | 20.21 ± 2.34                            | 7.98 ± 0.77      | ↓ (2.5-fold)  | < 0.001      | 1.23    |      |
| Cer (d18:1/23:1) |                  | 6.12 ± 0.68                             | 3.53 ± 0.57      | ↓ (1.7-fold)  | < 0.001      | 1.15    |      |
| Cer (d18:1/23:4) |                  | 10.83 ± 1.36                            | 6.59 ± 0.94      | ↓ (1.6-fold)  | < 0.001      | 1.12    |      |
| Cer (d18:1/24:0) |                  | 94.34 ± 11.31                           | 59.18 ± 4.41     | ↓ (1.6-fold)  | < 0.001      | 1.15    |      |
| Cer (d18:1/25:1) |                  | 12.89 ± 1.30                            | 7.19 ± 0.79      | ↓ (1.8-fold)  | < 0.001      | 1.19    |      |
| Cer (d18:2/16:1) |                  | 0.43 ± 0.12                             | 0.14 ± 0.11      | ↓ (3.1-fold)  | < 0.001      | 1.01    |      |
| Cer (d18:2/18:1) |                  | 29.29 ± 4.66                            | 15.50 ± 4.51     | ↓ (1.9-fold)  | < 0.001      | 1.07    |      |

|        |                     |                  |                  |              |         |      |
|--------|---------------------|------------------|------------------|--------------|---------|------|
|        | Cer (d18:2/22:0)    | 20.69 ± 2.36     | 5.54 ± 0.66      | ↓ (3.7-fold) | < 0.001 | 1.24 |
|        | Cer (d18:2/22:2)    | 11.92 ± 1.32     | 2.20 ± 0.34      | ↓ (5.4-fold) | < 0.001 | 1.25 |
|        | Cer (d18:2/24:1)    | 44.30 ± 4.83     | 15.60 ± 2.13     | ↓ (2.8-fold) | < 0.001 | 1.23 |
|        | Cer (d18:2/24:2)    | 0.20 ± 0.08      | 0.04 ± 0.04      | ↓ (5.0-fold) | < 0.001 | 1.02 |
|        | Cer (d19:1/24:0)    | 2.07 ± 0.16      | 1.31 ± 0.12      | ↓ (1.6-fold) | < 0.001 | 1.19 |
| DHSM   | SM (d19:0/17:0)     | 61.14 ± 6.00     | 486.01 ± 120.85  | ↑ (7.9-fold) | < 0.001 | 1.18 |
|        | SM (d31:0)          | 7.57 ± 0.84      | 3.80 ± 0.41      | ↓ (2.0-fold) | < 0.001 | 1.20 |
|        | SM (d33:0)          | 5.70 ± 0.57      | 18.35 ± 2.39     | ↑ (3.2-fold) | < 0.001 | 1.23 |
|        | SM (d35:0)          | 7.68 ± 0.84      | 32.41 ± 8.16     | ↑ (4.2-fold) | < 0.001 | 1.15 |
|        | SM (d37:0)          | 2.43 ± 0.22      | 6.95 ± 1.77      | ↑ (2.9-fold) | < 0.001 | 1.11 |
|        | SM (d38:0)          | 24.27 ± 3.18     | 123.33 ± 22.22   | ↑ (5.1-fold) | < 0.001 | 1.21 |
|        | SM (d41:0)          | 4.08 ± 0.63      | 13.62 ± 4.15     | ↑ (3.3-fold) | < 0.001 | 1.08 |
|        | SM (t18:0/16:0)     | 1.89 ± 0.22      | 5.07 ± 1.03      | ↑ (2.7-fold) | < 0.001 | 1.15 |
| SM     | SM (d17:1/16:0)     | 244.93 ± 27.64   | 135.19 ± 15.69   | ↓ (1.8-fold) | < 0.001 | 1.18 |
|        | SM (d17:1/22:0)     | 117.26 ± 14.61   | 55.91 ± 8.68     | ↓ (2.1-fold) | < 0.001 | 1.19 |
|        | SM (d18:1/16:0)     | 3006.91 ± 220.12 | 5082.23 ± 322.27 | ↑ (1.7-fold) | < 0.001 | 1.24 |
|        | SM (d18:1/22:0)     | 1155.48 ± 147.64 | 810.72 ± 129.01  | ↓ (1.4-fold) | < 0.001 | 1.01 |
|        | SM (d18:1/23:0)     | 259.03 ± 32.20   | 135.73 ± 21.60   | ↓ (1.9-fold) | < 0.001 | 1.17 |
|        | SM (d18:1/23:1)     | 505.39 ± 70.01   | 325.63 ± 53.08   | ↓ (1.6-fold) | < 0.001 | 1.06 |
|        | SM (d18:1/24:0)     | 922.37 ± 135.22  | 520.03 ± 75.10   | ↓ (1.8-fold) | < 0.001 | 1.13 |
|        | SM (d18:1/24:1)     | 2437.41 ± 193.05 | 3429.76 ± 385.15 | ↑ (1.4-fold) | < 0.001 | 1.12 |
|        | SM (d18:2/16:0)     | 397.65 ± 47.56   | 216.01 ± 23.74   | ↓ (1.8-fold) | < 0.001 | 1.18 |
|        | SM (d18:2/20:0)     | 200.55 ± 22.38   | 116.83 ± 15.69   | ↓ (1.7-fold) | < 0.001 | 1.16 |
|        | SM (d18:2/22:0)     | 571.72 ± 80.68   | 232.99 ± 42.66   | ↓ (2.5-fold) | < 0.001 | 1.19 |
|        | SM (d18:2/22:1)     | 20.44 ± 3.03     | 13.34 ± 2.24     | ↓ (1.5-fold) | < 0.001 | 1.03 |
|        | SM (d18:2/23:0)     | 110.84 ± 14.16   | 39.30 ± 7.56     | ↓ (2.8-fold) | < 0.001 | 1.21 |
|        | SM (d18:2/24:1)     | 455.59 ± 69.08   | 233.05 ± 41.98   | ↓ (2.0-fold) | < 0.001 | 1.14 |
|        | SM (d19:1/16:0)     | 234.66 ± 24.14   | 302.06 ± 32.19   | ↑ (1.3-fold) | < 0.001 | 1.02 |
|        | SM (d37:1)          | 39.53 ± 4.00     | 26.26 ± 3.58     | ↓ (1.5-fold) | < 0.001 | 1.11 |
|        | SM (d38:3)          | 2.60 ± 0.39      | 1.37 ± 0.22      | ↓ (1.9-fold) | < 0.001 | 1.14 |
|        | SM (d41:3)          | 25.77 ± 2.87     | 11.55 ± 2.51     | ↓ (2.2-fold) | < 0.001 | 1.19 |
|        | SM (d43:3)          | 9.27 ± 1.23      | 5.14 ± 0.90      | ↓ (1.8-fold) | < 0.001 | 1.14 |
| HexCer | HexCer (d18:1/26:3) | 1.10 ± 0.18      | 0.61 ± 0.21      | ↓ (1.8-fold) | < 0.001 | 1.00 |
| LacCer | LacCer (d17:1/22:0) | 1.74 ± 0.47      | 0.25 ± 0.28      | ↓ (7.0-fold) | < 0.001 | 1.14 |



|    |                          |              |                |              |         |      |
|----|--------------------------|--------------|----------------|--------------|---------|------|
|    | LacCer (d18:1/16:0 (OH)) | 20.74 ± 2.02 | 10.54 ± 1.25   | ↓ (2.0-fold) | < 0.001 | 1.21 |
|    | LacCer (d18:1/22:1)      | 10.29 ± 2.09 | 4.69 ± 1.04    | ↓ (2.2-fold) | < 0.001 | 1.11 |
|    | LacCer (d18:1/23:0)      | 11.90 ± 2.10 | 4.77 ± 1.68    | ↓ (2.5-fold) | < 0.001 | 1.13 |
|    | LacCer (d18:1/24:0 (OH)) | 15.14 ± 3.38 | 6.49 ± 1.85    | ↓ (2.3-fold) | < 0.001 | 1.09 |
| So | So (m18:1)               | 0.18 ± 0.03  | 0.40 ± 0.06    | ↑ (2.2-fold) | < 0.001 | 1.15 |
|    | So (m22:2)               | 4.83 ± 0.74  | 10.43 ± 2.03   | ↑ (2.2-fold) | < 0.001 | 1.13 |
|    | So (d15:2)               | 0.11 ± 0.03  | 0.23 ± 0.05    | ↑ (2.1-fold) | < 0.001 | 1.04 |
|    | So (d18:1)               | 0.58 ± 0.07  | 1.24 ± 0.17    | ↑ (2.1-fold) | < 0.001 | 1.18 |
|    | So (t20:1)               | 0.63 ± 0.15  | 1.33 ± 0.36    | ↑ (2.1-fold) | < 0.001 | 1.00 |
| Sa | Sa (m18:0)               | 42.69 ± 5.57 | 68.83 ± 7.73   | ↑ (1.6-fold) | < 0.001 | 1.13 |
|    | Sa (d16:0)               | 52.87 ± 6.41 | 115.68 ± 22.02 | ↑ (2.2-fold) | < 0.001 | 1.13 |
|    | Sa (d18:0)               | 18.79 ± 3.51 | 47.20 ± 8.94   | ↑ (2.5-fold) | < 0.001 | 1.15 |
|    | Sa (d20:0)               | 20.02 ± 2.59 | 42.86 ± 7.41   | ↑ (2.1-fold) | < 0.001 | 1.14 |
|    | Sa (d22:0)               | 20.69 ± 3.36 | 50.92 ± 8.76   | ↑ (2.5-fold) | < 0.001 | 1.16 |
|    | Sa (t16:0)               | 3.55 ± 0.53  | 8.39 ± 2.58    | ↑ (2.4-fold) | < 0.001 | 1.01 |
